# Supplementary material for: Blocking CD47 with restructured peptide nanoparticles for motivating phagocytosis to inhibit tumor progression
Source: Royal Society of Chemistry journal article supplement (doi:10.1039/d2bm00189f), 2022-01-01
Supplement: d2bm00189f1.pdf [file d2bm00189f1.pdf]

## Supplementary

### Blocking CD47 with restructured peptide nanoparticles for motivating phagocytosis to inhibit tumor progression

Yiyi Xia<sup>1,#</sup>, Tiantian Wang<sup>2,#</sup>, Linjie Wu<sup>1</sup>, Haiqing Zhong<sup>1</sup>, Yi Zhou<sup>1</sup>, Peng Ke<sup>1</sup>,  
Xiaoyan Bao<sup>1</sup>, Qi Dai<sup>1,4</sup>, Qiyao Yang<sup>1,4</sup>, Yiyi Lu<sup>1</sup>, Donghang Xu<sup>2,\*</sup>, Min Liang<sup>3,\*</sup>,  
Min Han<sup>1,\*</sup>

<sup>1</sup> Institute of Pharmaceutics, College of Pharmaceutical Sciences, Zhejiang University, Hangzhou 310058, China.

<sup>2</sup> Department of Pharmacy, The Second Affiliated Hospital, College of Medicine, Zhejiang University, Hangzhou 310009, China.

<sup>3</sup> Department of Anesthesiology, Anesthesiology Research Institute, the First Affiliated Hospital of Fujian Medical University, Fuzhou 350005, China;

<sup>4</sup> Department of Radiation Oncology, Key Laboratory of Cancer Prevention and Intervention, The Second Affiliated Hospital, College of Medicine, Zhejiang University, Hangzhou 310058, China.

\* Corresponding author: hanmin@zju.edu.cn (M. Han.); scarlett.q@live.cn (M. Liang.); xudonghang@zju.edu.cn (DH. Xu.).

# YY. Xia and TT. Wang contributed equally to this work.

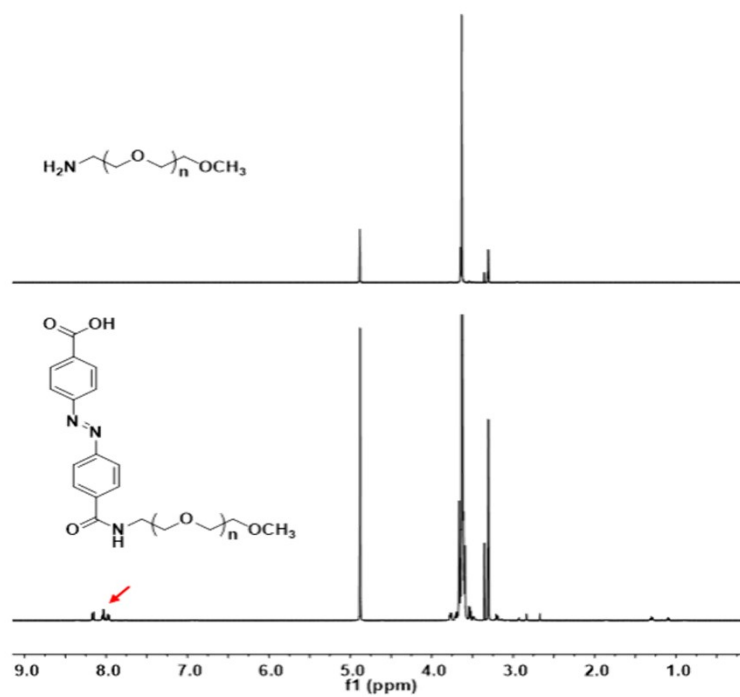

Fig. S1  $^1\text{H}$  NMR spectrum of mPEG-NH<sub>2</sub> and PEG-Azo polymer.

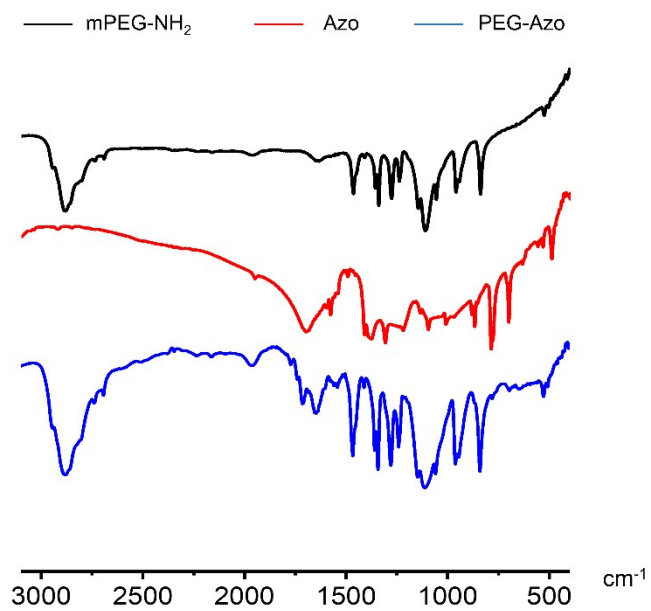

Fig. S2 IR spectra of the mPEG-NH<sub>2</sub>, Azo and PEG-Azo.

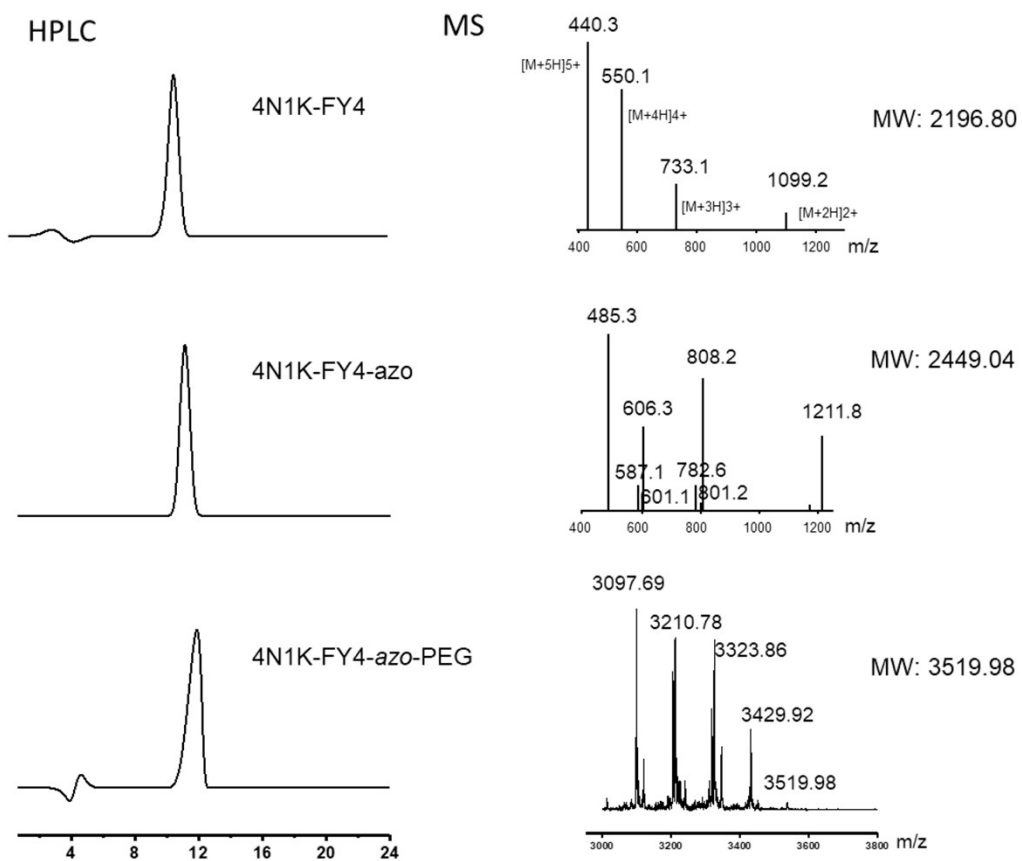

Fig. S3 The HPLC and MS spectrum of PAP NPs.

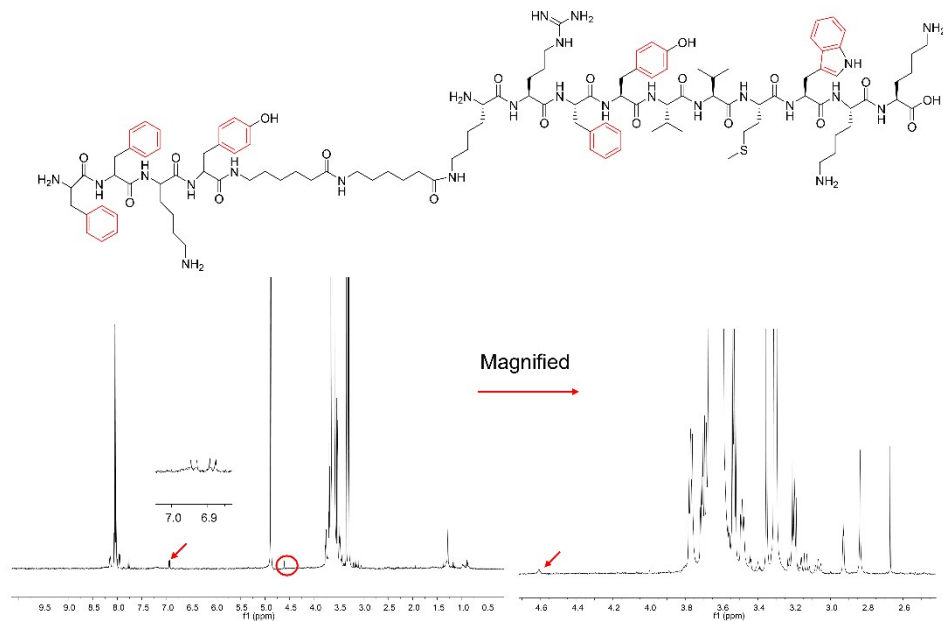

Fig. S4 The structure and  $^1\text{H}$  NMR spectrum of PAP polymer.

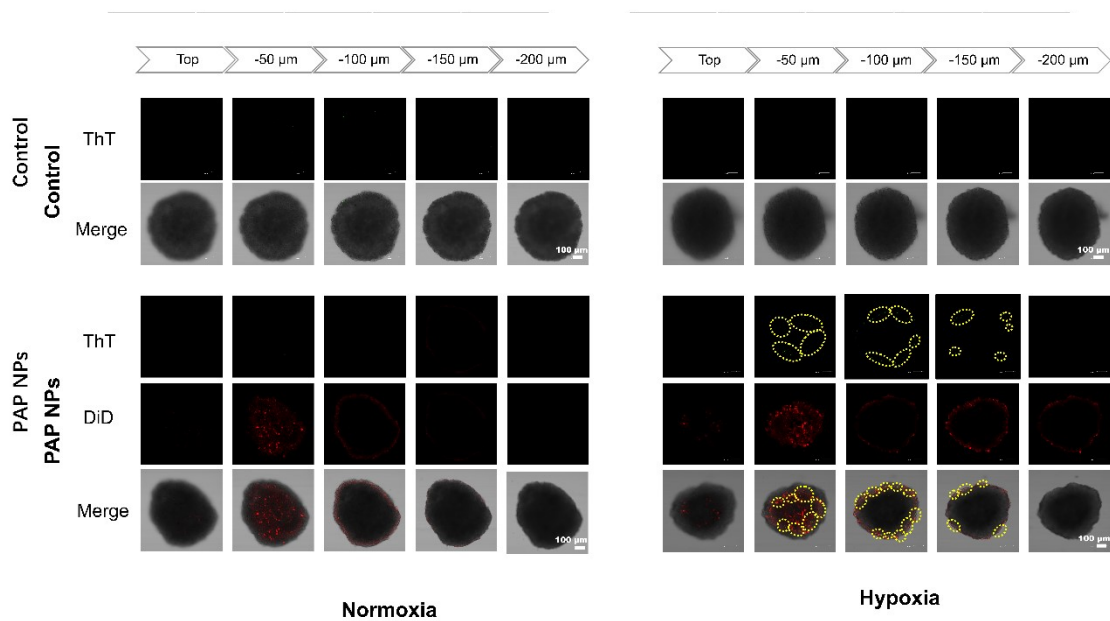

Fig. S5 The penetration of PAP NPs and self-assembled fiber networks on 3D tumor spheres in vitro. Confocal images showing the penetration of the PAP NPs loading DiD in tumor spheres after 12 hours under hypoxia and labeling the self-assembled fiber network with ThT. The control group was treated without preparation and only ThT staining was applied.

150% →

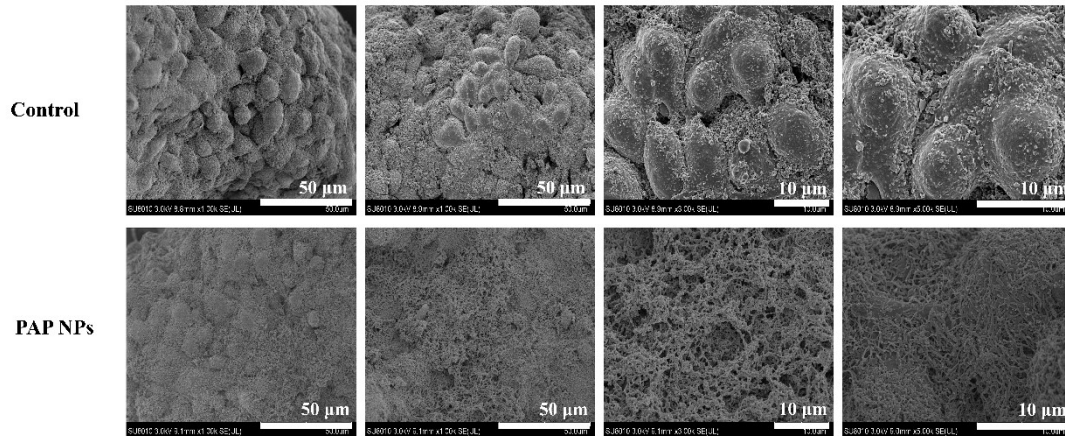

Fig. S6 The SEM of B16F10 spheres with an average diameter of about 500 μm, were treated with PAP NPs (250 μM) for 12 h under hypoxic condition. The tumor spheres were untreated with drugs as the control groups.

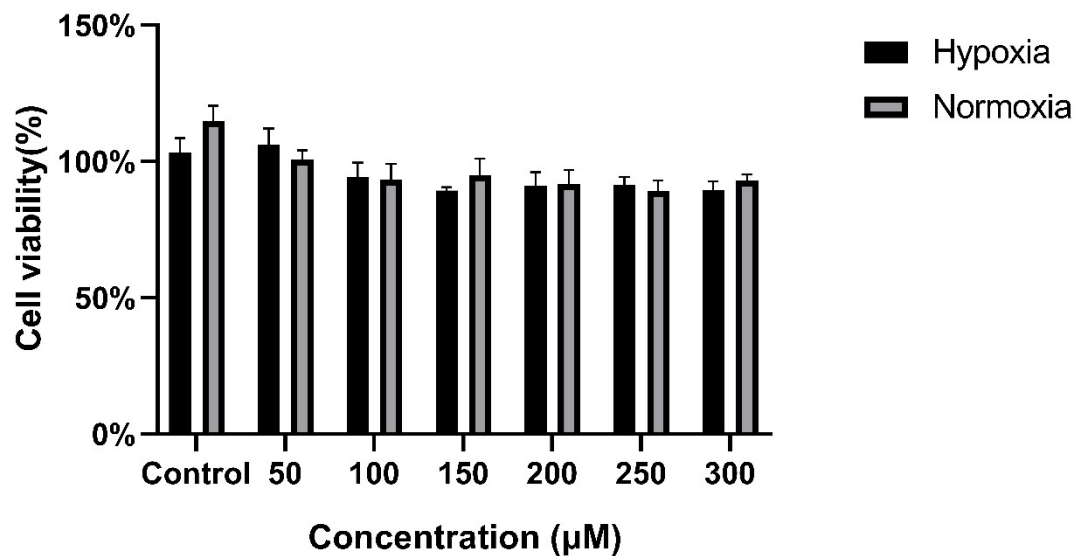

Fig. S7 Together with same preparation concentration but under different culture conditions for 12 h, *in vitro* cytotoxicity of PAP NPs against B16F10 cells was determined by the CCK-8 cell viability assay. Each value is represented as mean ± SD (n=5).

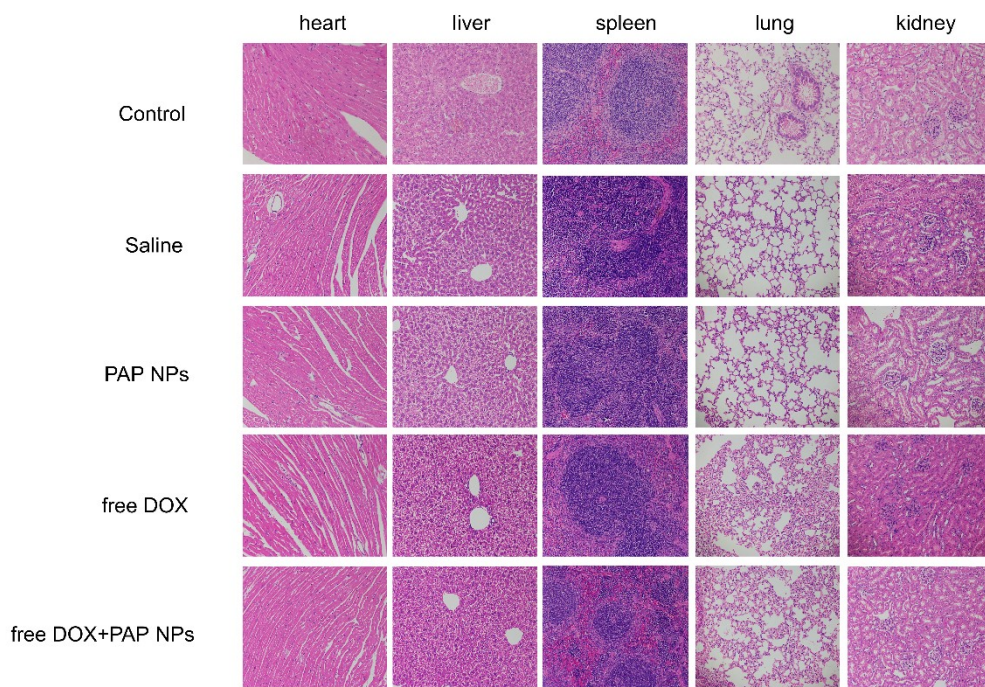

Fig. S8 H&E staining of organs from different groups after treatment. The scale bar is 10  $\mu$ m.
